# Supplementary material for: Hydrogen desorption from the surface and subsurface of cobalt
Source: Royal Society of Chemistry journal article supplement (doi:10.1039/d0cp02410d), 2020-01-01
Supplement: d0cp02410d1.pdf [file d0cp02410d1.pdf]

## Electronic Supplementary Information

### Hydrogen Desorption from the Surface and Subsurface of Cobalt

Ryan A. Ciufu<sup>ab</sup>, Sungmin Han<sup>a</sup>, Michael E. Floto<sup>a</sup>, J. Ehren Eichler<sup>a</sup>, Graeme Henkelman<sup>\*ab</sup>, and C. Buddie Mullins<sup>\*ac</sup>

<sup>a.</sup> Department of Chemistry, University of Texas at Austin, Austin, Texas 78712 United States.

<sup>b.</sup> The Oden Institute for Computational Engineering and Science, University of Texas at Austin, Austin, Texas 78712, United States.

<sup>c.</sup> The McKetta Department of Chemical Engineering, Texas Materials Institute, Center for Electrochemistry, University of Texas at Austin, Austin, Texas 78712, United States.

#### Details on Microkinetic Modelling.

Temperature programmed desorption (TPD) spectra were simulated using the desorption energies calculated from density functional theory (DFT). For associative desorption of hydrogen, a linear fit to the coverage dependent desorption energies (Table 1) was used (Figure S1). For associative hydrogen desorption from surface sites above a subsurface site, a desorption energy of 0.82 eV was used (Table 1,  $\theta = 1.0$ ,  $\theta_{\text{subsurface}} = 0.25$ ). After desorption of hydrogen from above a subsurface site, the subsurface hydrogen was allowed to resurface. Once all subsurface hydrogen was depleted, desorption followed the coverage dependent rate.

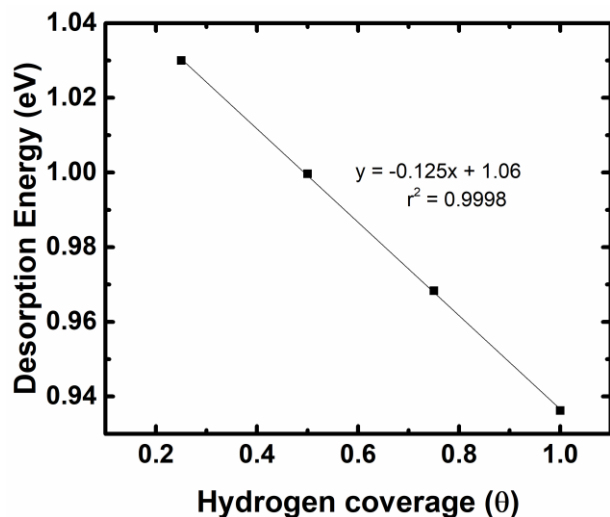

**Figure S1.** Linear fit for coverage dependent hydrogen desorption energies used for microkinetic analysis.
